# Supplementary material
Source: Springer Nature journal article supplement (https://springermedizin.de/resource/supplementary/12885_2008_1387_MOESM7_ESM.pdf/9472986)

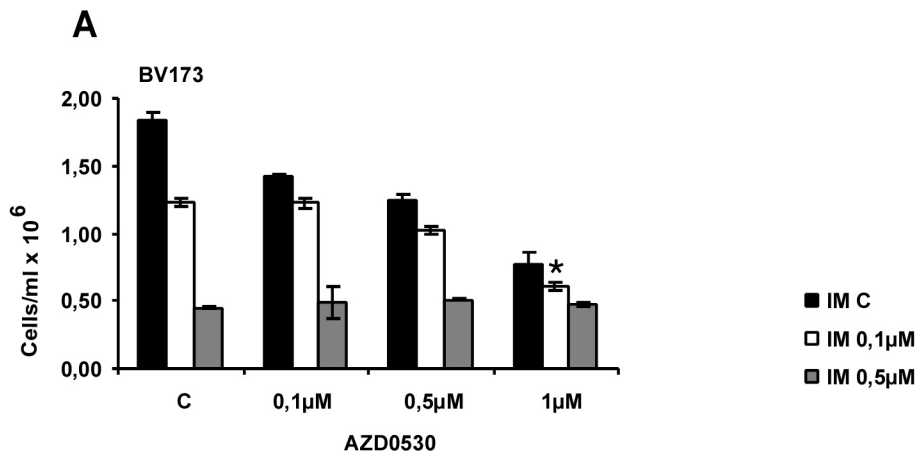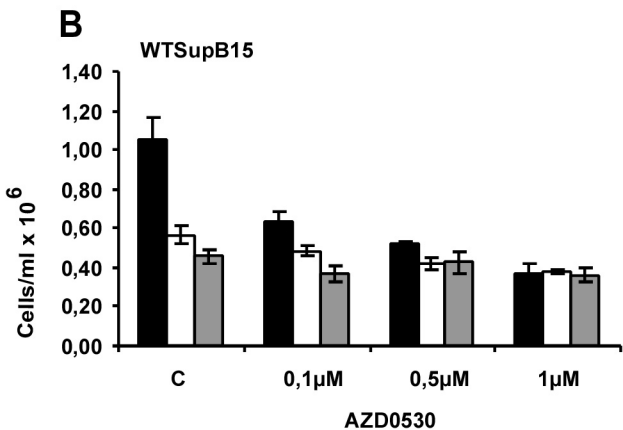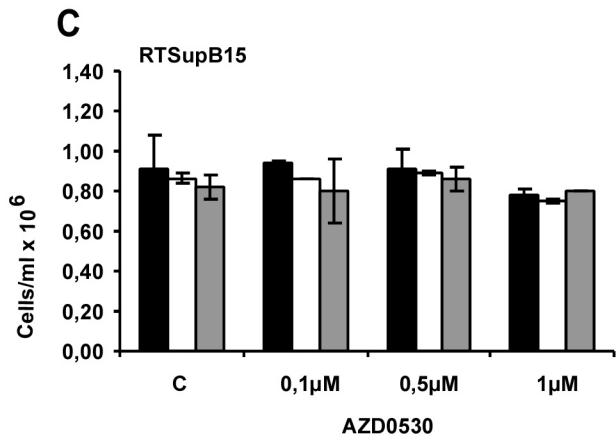

Supplement: MOESM7 [file 9472986]
